# Supplementary material for: Boosting the ORR kinetics of protonic ceramic fuel cells via surface decoration using nonreactive insulators
Source: Royal Society of Chemistry journal article supplement (doi:10.1039/d4ta02788d), 2024-01-01
Supplement: d4ta02788d1.pdf [file d4ta02788d1.pdf]

## **Boosting ORR Kinetics of Protonic Ceramic Fuel Cell via Surface Decoration Using Nonreactive Insulators**

Bingbing Qiu<sup>a</sup>, Kang Zhu<sup>a</sup>, Yi Yang<sup>a</sup>, Lujuan Ye<sup>a</sup>, Lijie Zhang<sup>a</sup>, Changrong Xia<sup>a</sup>, Ranran Peng<sup>a,b,c\*</sup> and Yalin Lu<sup>a,b,c\*</sup>

<sup>a</sup> Department of Materials Science and Engineering, University of Science and Technology of China, No. 96 Jinzhai Road, Hefei, Anhui Province, 230026, PR China.

<sup>b</sup> Synergetic Innovation Center of Quantum Information & Quantum Physics, University of Science and Technology of China, Hefei, Anhui 230026, China.

<sup>c</sup> Hefei National Laboratory of Physical Science at the Micro-scale, University of Science and Technology of China, Hefei, 230026 Anhui, China.

\*To whom correspondence should be addressed. E-mail: pengrr@ustc.edu.cn and yllu@ustc.edu.cn.

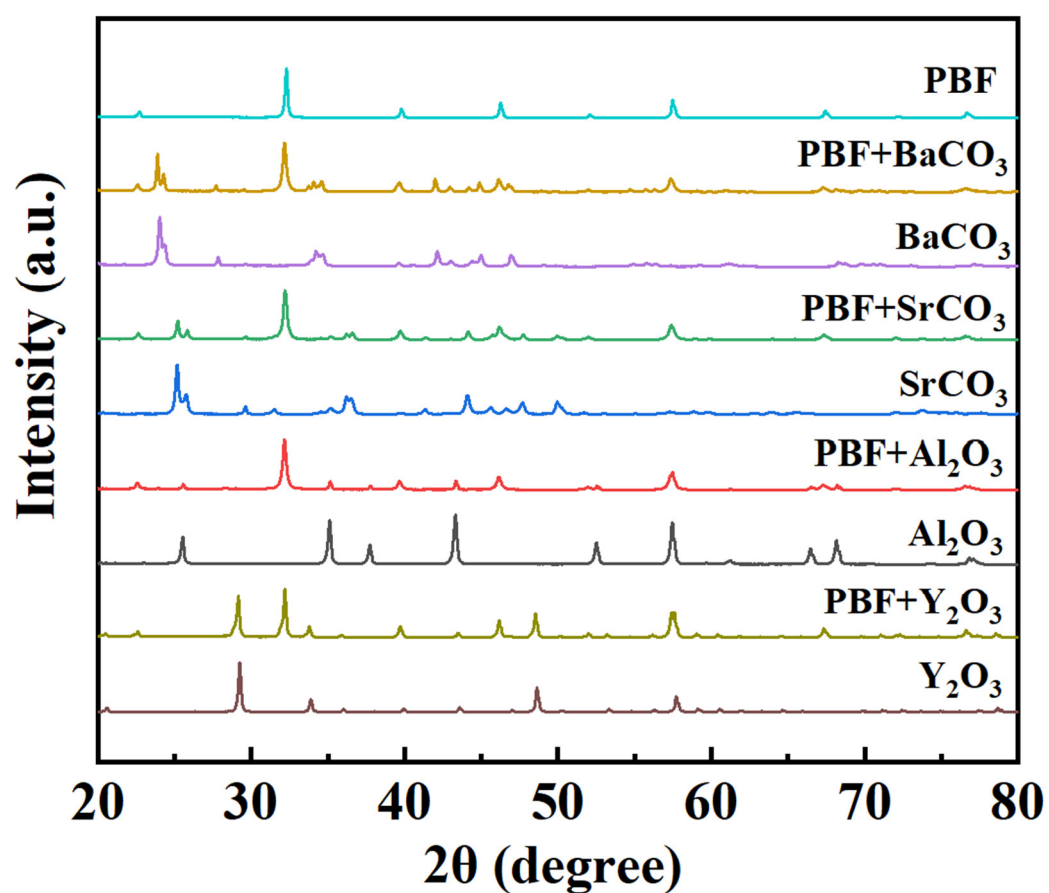

**Figure S1** (a) XRD patterns of PBF, insulators, the mixture of PBF and insulators at 1:1 mass ratio and then calcined at 700 °C for 2 h.

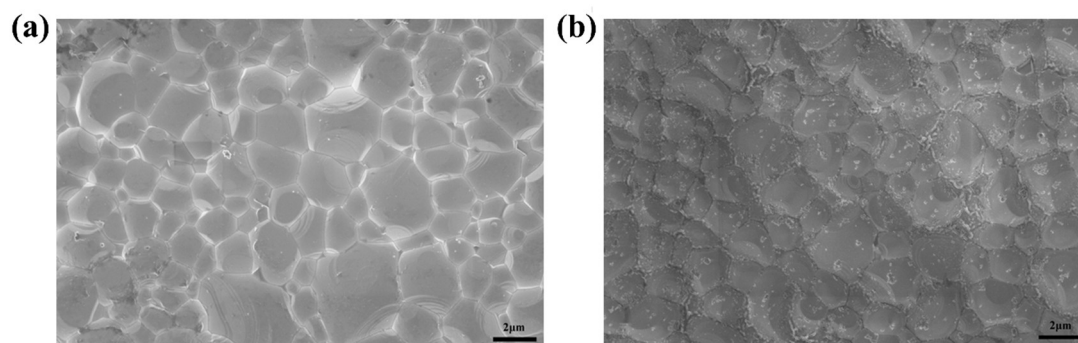

**Figure S2** SEM images of surface of dense pristine PBF bars (a) and PBF bars with Y<sub>2</sub>O<sub>3</sub>.

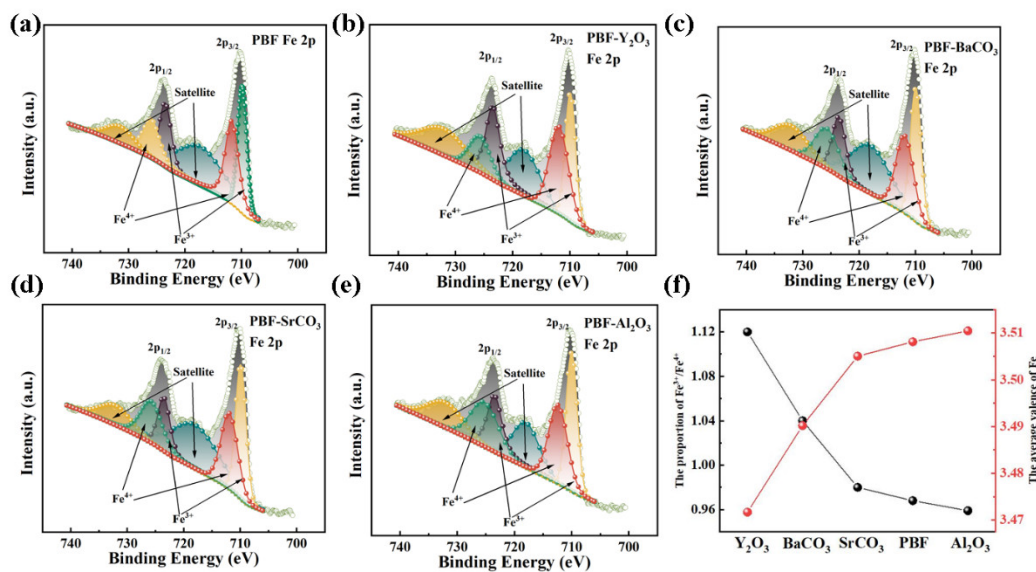

**Figure S3** XPS spectra and fitted lines of Fe 2p in the (a)PBF, (b)PBF- $Y_2O_3$  (c)PBF- $BaCO_3$ , (d)PBF- $SrCO_3$  and (e)PBF- $Al_2O_3$  sample at room temperature. (f)The value of  $Fe^{3+}/Fe^{4+}$  and the average valence of Fe.

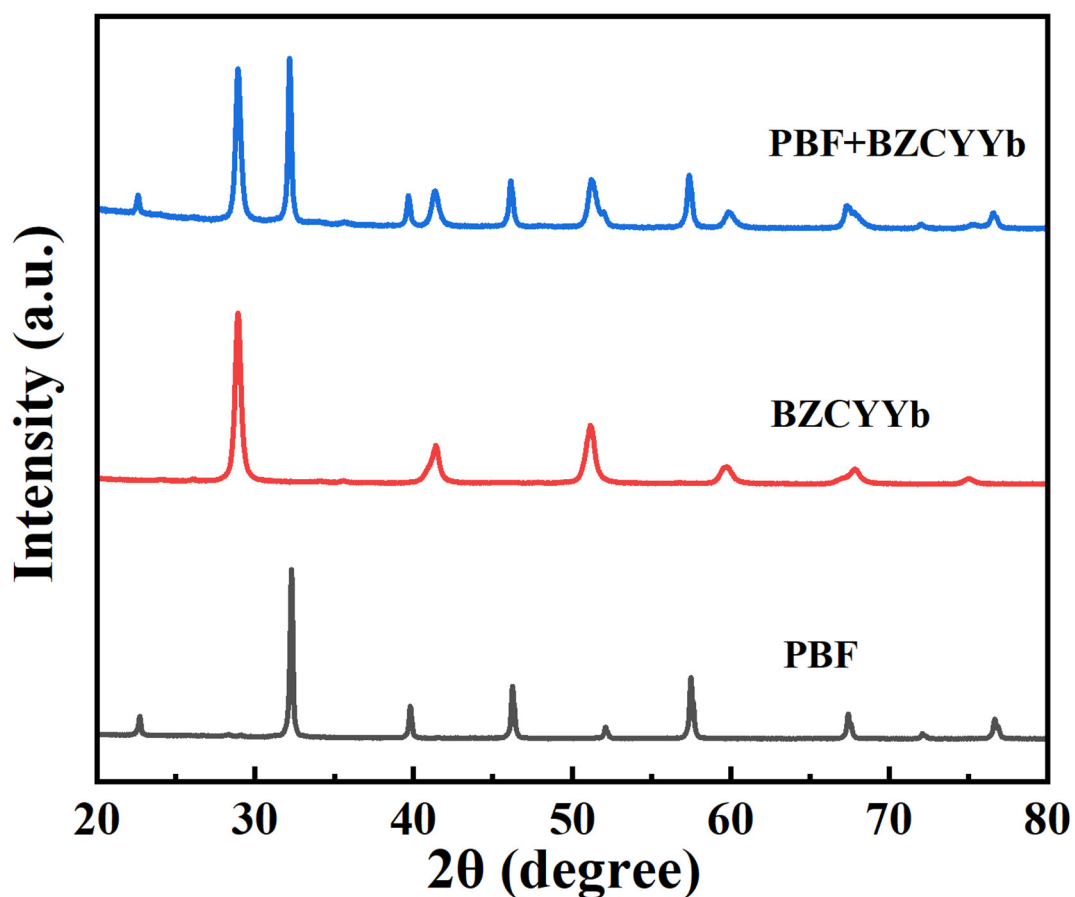

**Figure S4** XRD patterns of PBF, BZCYYb, the mixture of PBF and BZCYYb at 1:1 mass ratio and then calcined at 1000 °C for 2 h.

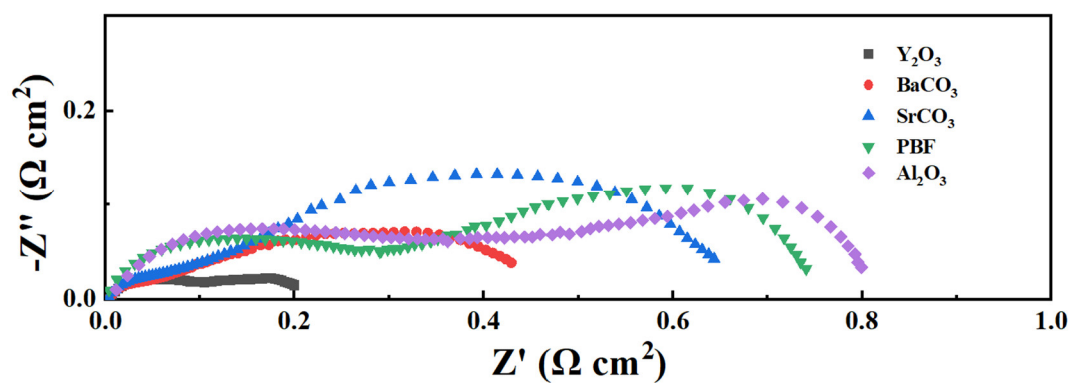

**Figure S5** Nyquist impedance plots for PBF and PBF with different insulators at 700 °C.

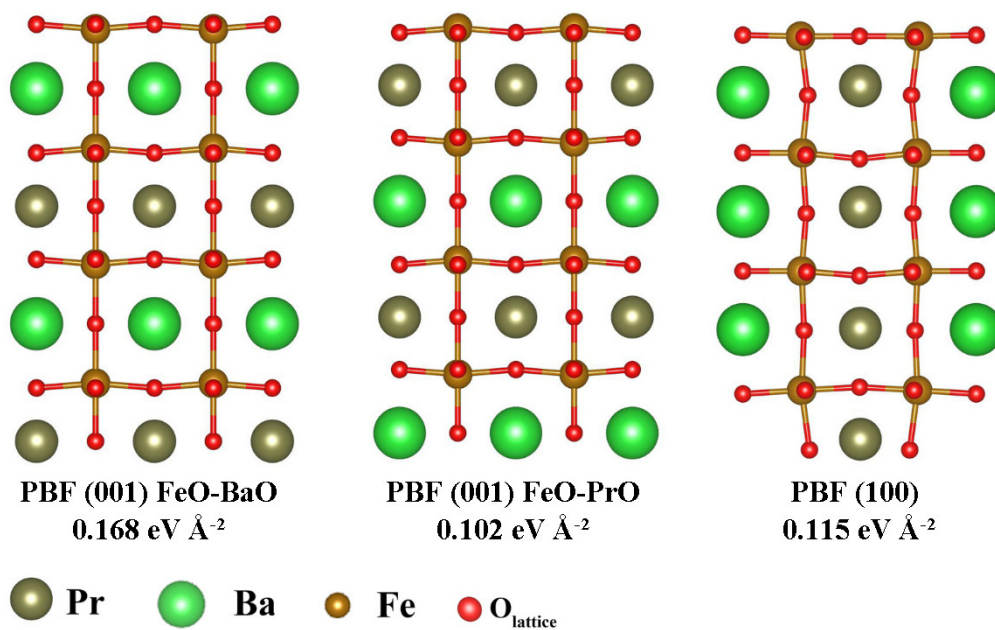

**Figure S6** Schematic illustrations of (a) PBF (001) with BaO sub-outer layer (b) PBF(001) with PrO sub- outer layer (c) PBF(100) and their surface energy.

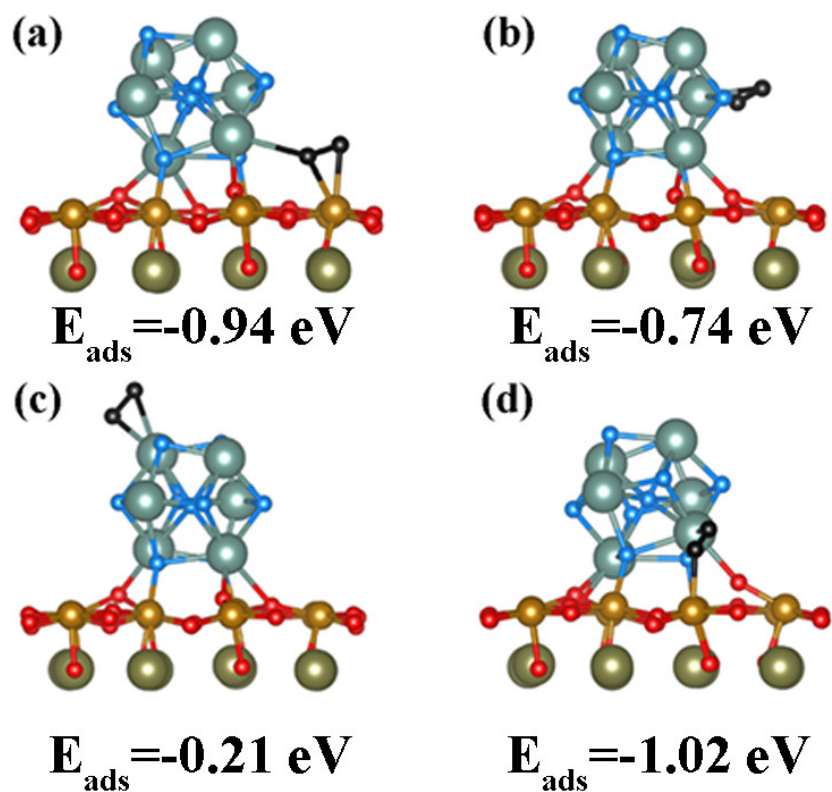

**Figure S7** Schematic illustrations of the oxygen absorption structure on PBF with  $\text{Y}_2\text{O}_3$  surface and the oxygen absorption energy at (a) bottom, (b) middle, (c) top and (d) interface adsorption site.

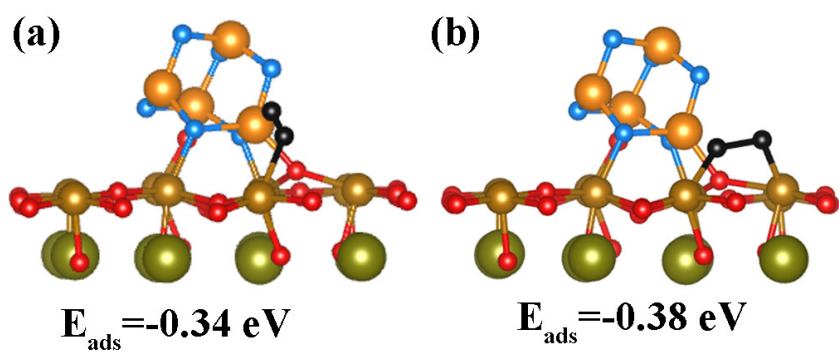

**Figure S8** Schematic illustrations of the oxygen absorption structure on PBF with  $\text{Al}_2\text{O}_3$  surface and the oxygen absorption energy at (a) interface, (b) PBF surface site.

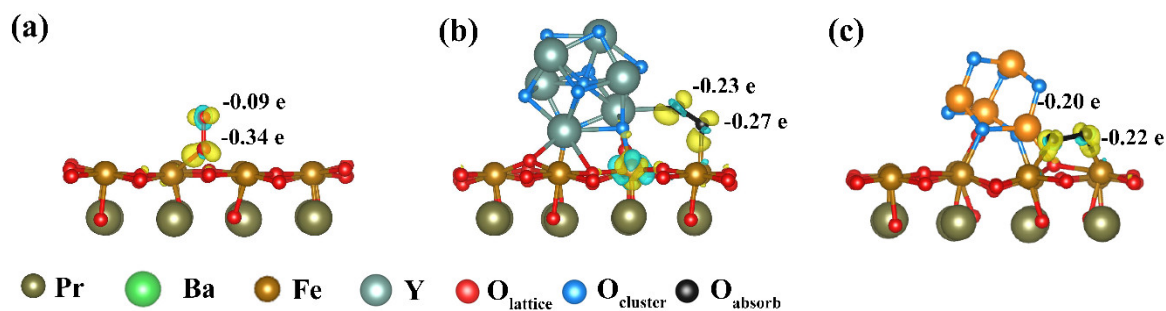

**Figure S9** Schematic illustrations and Bader charge analysis of the oxygen absorption structure on (a) bare PBF, (b) PBF with  $Y_2O_3$  surface and (c) PBF with  $Al_2O_3$  surface.

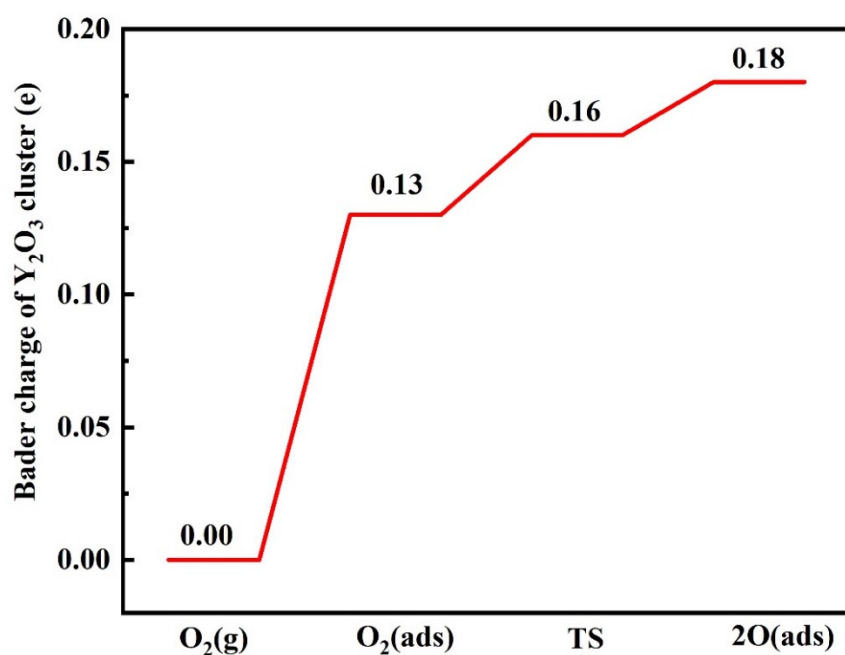

**Figure S10** Bader charge of  $Y_2O_3$  cluster during oxygen adsorption and dissociation process.

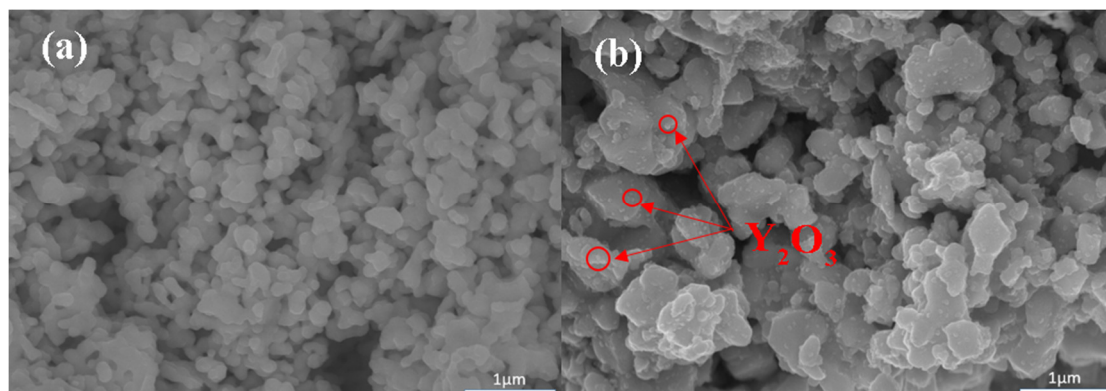

**Figure S11** SEM images of (a) pure PBF and (b) PBF with  $Y_2O_3$  nanoparticles.

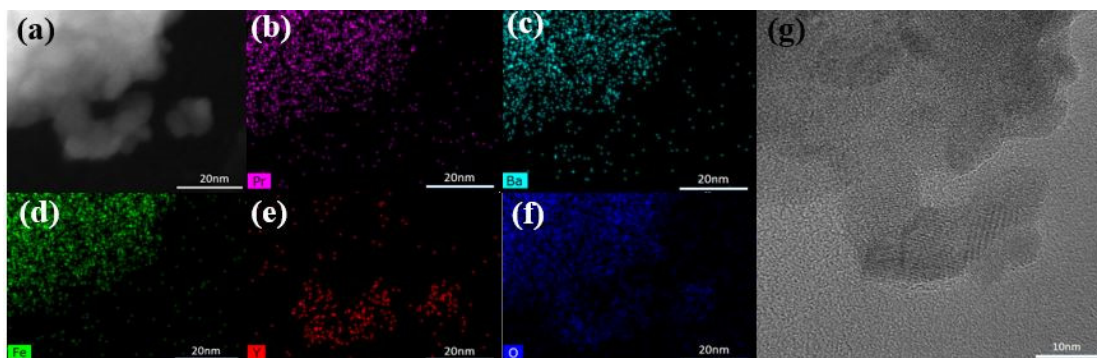

**Figure S12** (a)-(f) the EDX mapping and (g) the HRTEM image of the PBF- $\text{Y}_2\text{O}_3$  composite cathode.

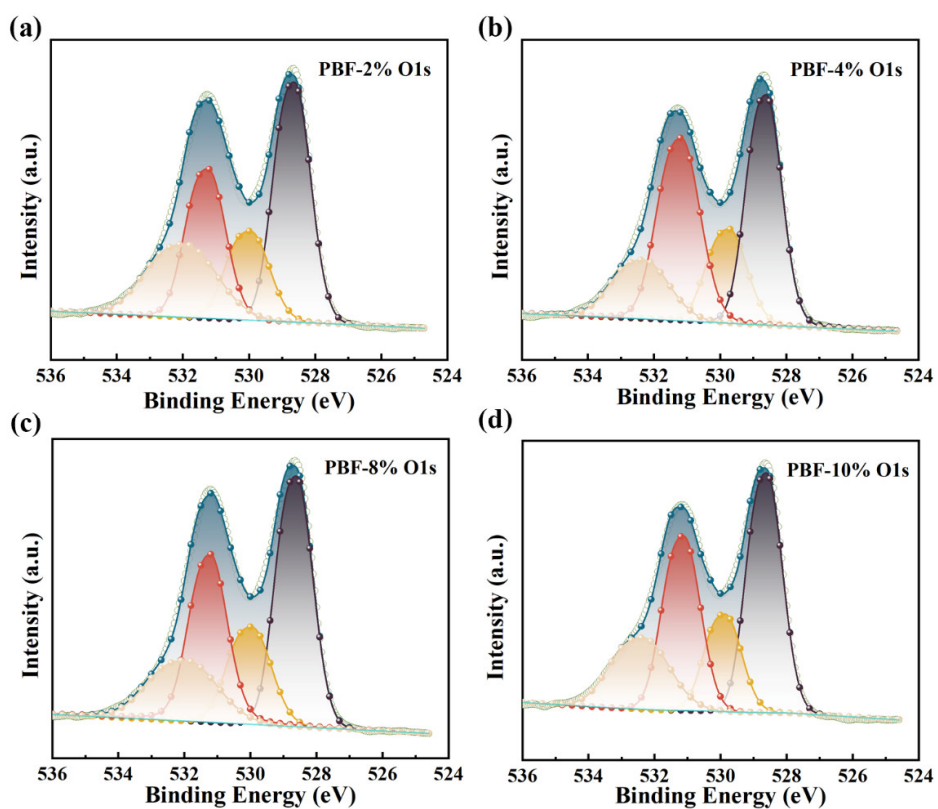

**Figure S13** O 1s species on the surface of the PBF with (a) 2%, (b) 4%, (c) 8% and (d) 10%  $\text{Y}_2\text{O}_3$ .

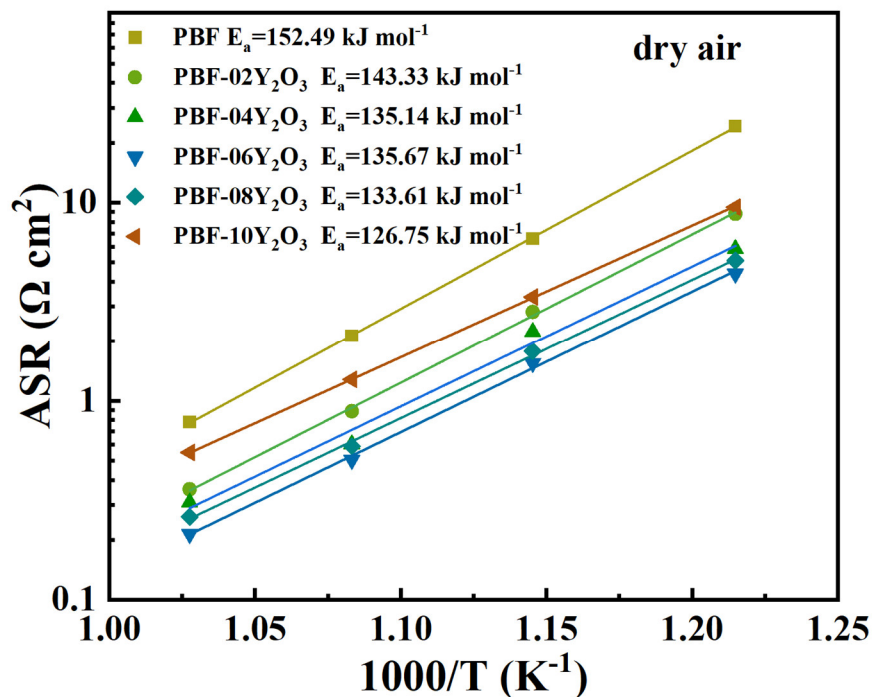

**Figure S14** The fitted oxygen surface exchange coefficients and their respective activation energies of PBF and PBF with different amount of Y<sub>2</sub>O<sub>3</sub> at 550-700 °C in dry air.

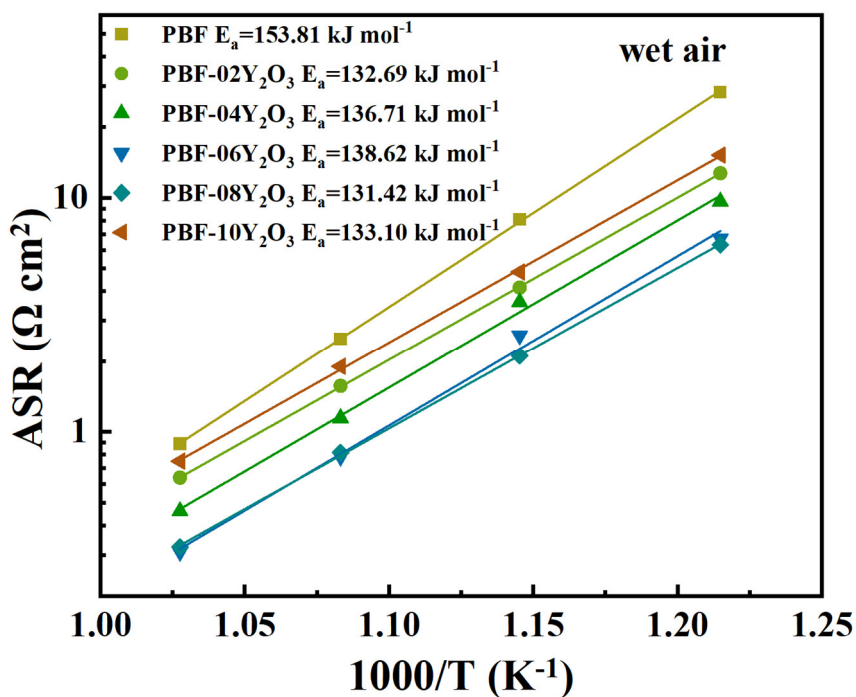

s

**Figure S15** The fitted oxygen surface exchange coefficients and their respective activation energies of PBF and PBF with different amount of Y<sub>2</sub>O<sub>3</sub> at 550-700 °C in air containing 3% H<sub>2</sub>O.

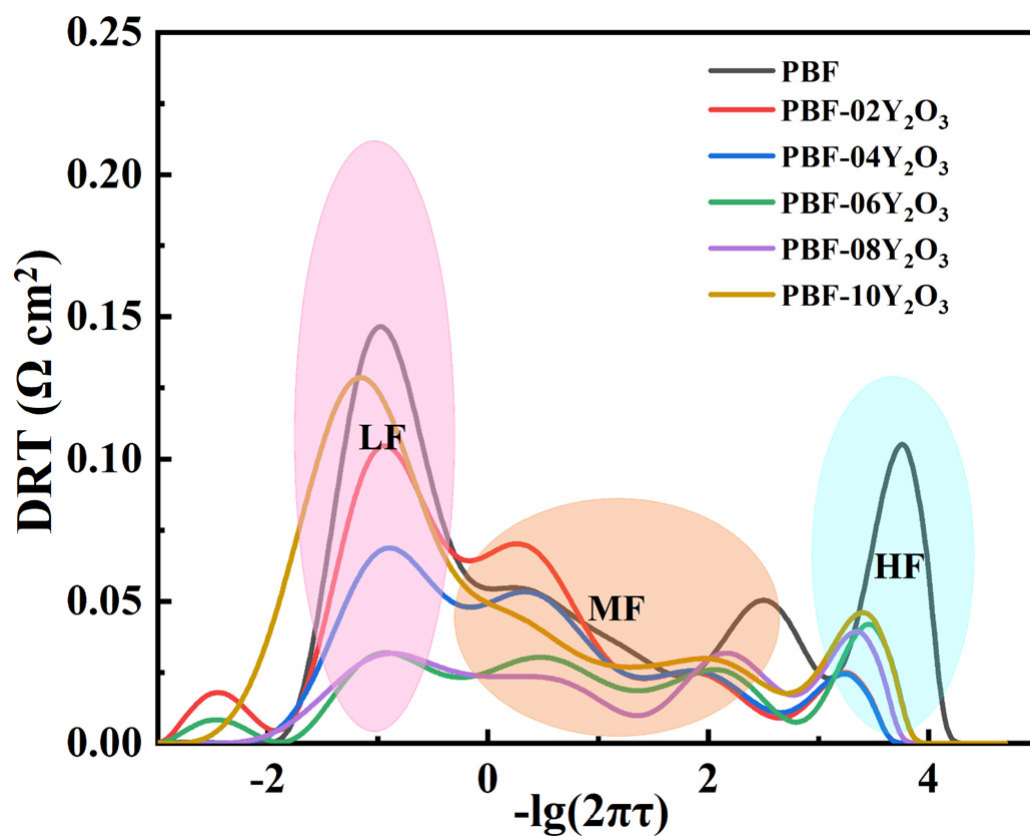

**Figure S16** DRT analysis of PBF and PBF with different amount of  $\text{Y}_2\text{O}_3$  at  $700^\circ\text{C}$  in wet air.

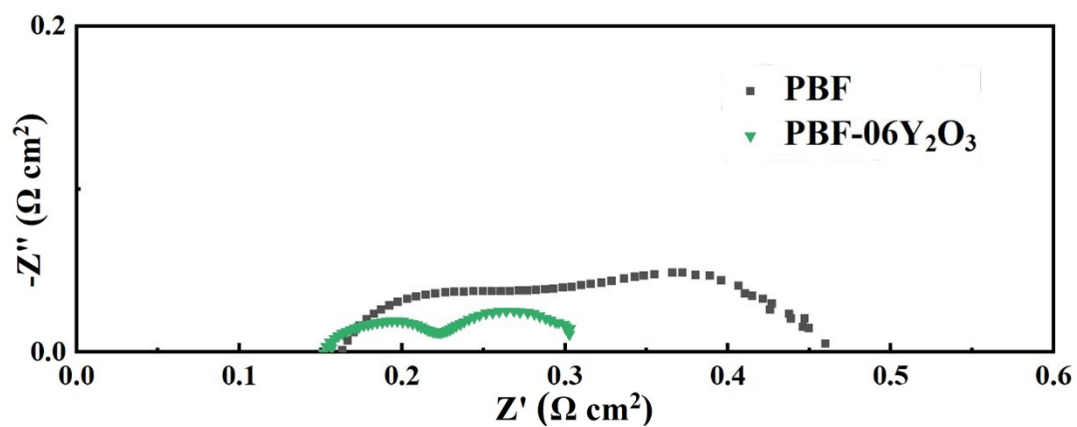

**Figure S17** Nyquist impedance plots for single cells with PBF and PBF-06 cathodes.

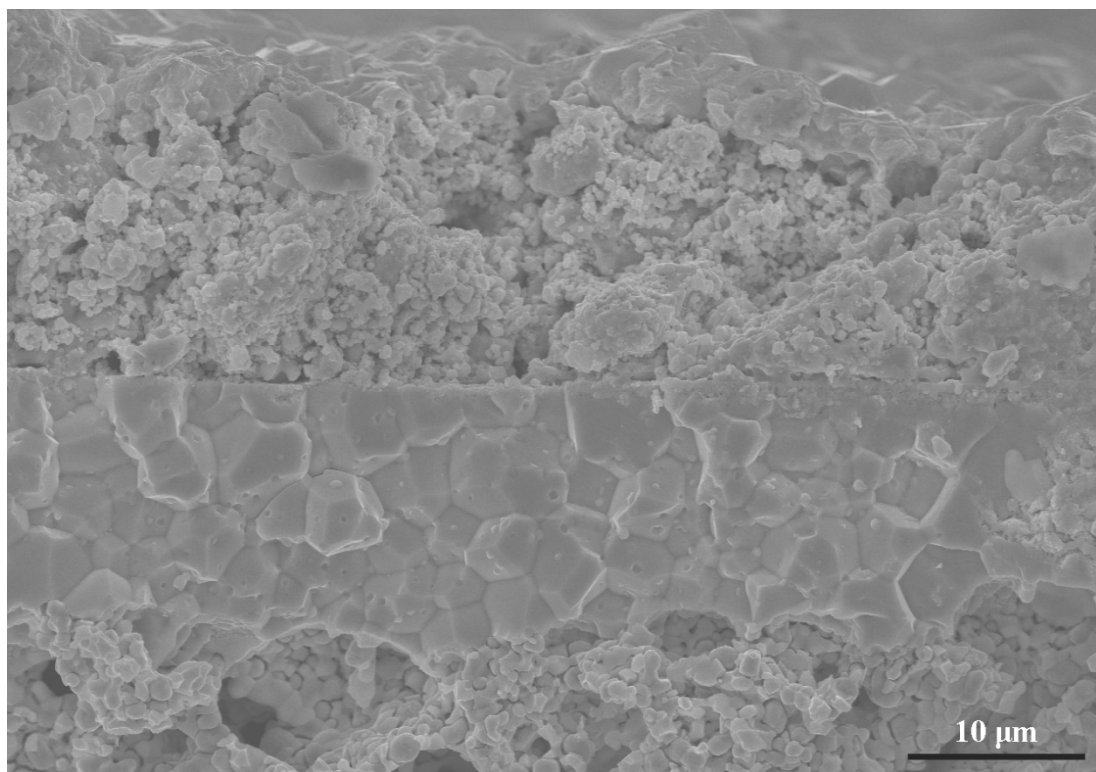

**Figure S18** the SEM image of PBF-06Y<sub>2</sub>O<sub>3</sub>|BZCYYb|Ni-BZCYYb after stability test.
